# Supplementary material for: Telehealth Music Therapy Services in the United States With Older Adults: A Descriptive Study
Source: Oxford University Press journal article supplement (doi:10.1093/mtp/miab028), 2022-01-03
Supplement: miab028_suppl_supplementary_material.pdf [file miab028_suppl_supplementary_material.pdf]

Survey of Music Therapists’ use of Telehealth with Older Adults

Demographic Questions

1. Current age: [dropdown]  
    <18 - 90
2. Gender: [dropdown]  
    Female  
    Male  
    Transgender Female  
    Transgender Male  
    Non-conforming/Non-binary  
    Other (please specify) \_\_\_\_\_
3. How many years have you been a music therapist? [dropdown]  
    1 - 60 dropdown
4. In which state do you currently reside? [dropdown]
5. What is the higher level of education you have completed?  
    Bachelor’s degree  
    Master’s degree  
    Doctoral degree  
    Other (please specify) \_\_\_\_\_

Music Therapy Services via Telehealth

General questions

6. How long have you been providing Telehealth with Older Adults?  
    0-6 months  
    7-12 months  
    13-18 months  
    19-24 months  
    > 24 months
7. In general, how has your session length changed compared with face-to-face session length?  
    shorter  
    same

longer  
other (please specify) \_\_\_\_\_

8. Where is the client during the Telehealth sessions? (select all that apply).

at their home  
in the home of someone else  
at a facility  
I do not know  
other (please explain) \_\_\_\_\_

9. Do you plan to continue with Telehealth sessions in the future?

Definitely yes  
Probably yes  
Might or might not  
Probably not  
Definitely not

***Financial questions***

10. How much do you or does your organization charge for a Telehealth group session PER HOUR?

[dropdown]

Free  
\$1-\$50  
\$51-\$75  
\$76-\$100  
>\$100  
I do not know

11. How much do you or does your organization charge for a Telehealth individual session PER HOUR? [dropdown]

Free  
\$1-\$50  
\$51-\$75  
\$76-\$100  
>\$100  
I do not know

12. How does this rate compare to your typical (face-to-face) session rates? [dropdown]
- less than

same

higher

I do not know

Technology Used by MT questions

13. What technology do you use to implement telehealth sessions with older adults? (select all that apply)
- smartphone/tablet

laptop computer

desktop computer
- I use the following with a SMARTPHONE/TABLET for telehealth services (select all that apply)

built-in microphone

built-in web-camera

external microphone

external web-camera
- I use the following with a LAPTOP COMPUTER for telehealth services (select all that apply)

built-in microphone

built-in web-camera

external microphone

external web-camera
- I use the following with a DESKTOP COMPUTER for telehealth services (select all that apply)

built-in microphone

built-in web-camera

external microphone

external web-camera
14. What platform do you typically use? (select all that apply)
- Zoom

Skype

FaceTime

Doxy.me

GoToMeeting

SimplePractice

TheraNest

other (please specify) \_\_\_\_\_

15. What factors impact your platform choice? (open-ended)

16. What types of technological glitches do you experience? (select all that apply)

video

audio

other (please specify) \_\_\_\_\_

17. How frequently do you typically experience technological glitches that impact therapeutic aims?

video

0-3 times per hour session

4-6 times per hour session

7-10 times per hour session

11+ times per hour session

audio

0-3 times per hour session

4-6 times per hour session

7-10 times per hour session

11+ times per hour session

other (please specify) \_\_\_\_\_

18. How are you connected to the internet? (select all that apply)

WiFi

Hardwired (Ethernet cable)

I do not know

other (please specify) \_\_\_\_\_

### ***Technology Used by Client questions***

19. What technology do your clients typically use for telehealth sessions? (select all that apply)

- smartphone/tablet
- laptop computer
- desktop computer
- I do not know
- My clients use the following with a SMARTPHONE/TABLET for telehealth sessions (select all that apply)
- built-in microphone
- built-in web-camera
- external microphone
- external web-camera
- I do not know
- My clients use the following with a LAPTOP COMPUTER for telehealth sessions (select all that apply)
- built-in microphone
- built-in web-camera
- external microphone
- external web-camera
- I do not know
- My clients use the following with a DESKTOP COMPUTER for telehealth sessions (select all that apply)
- built-in microphone
- built-in web-camera
- external microphone
- external web-camera
- I do not know

Clinical Considerations

20. What service delivery formats have you used for the Telehealth sessions with older adults? (select all that apply)
- individual client alone in a private space
- individual client in a private space with a helper/staff/family member
- group of clients in a shared gathering space

virtual group, with clients joining from multiple individual locations  
 other (please explain) \_\_\_\_\_

21. Select all of the music therapy interventions you have used with older adults in Telehealth sessions?

Gait Training with Music  
 Imagery with Music  
 Instrument Play  
 Iso-Principle  
 Life Review with Music/ Music Cued Reminiscence  
 Living Legacy Project  
 Movement to Music  
 Music Listening  
 Progressive Muscle Relaxation with Music  
 Sensory Stimulation with Music  
 Songwriting  
 Therapeutic Singing  
 other (please specify) \_\_\_\_\_

22. Please indicate your experience of using the following music therapy interventions when using Telehealth.

|                                                 | Works well in telehealth | Does not work well in telehealth |
|-------------------------------------------------|--------------------------|----------------------------------|
| Gait Training with Music                        |                          |                                  |
| Imagery with Music                              |                          |                                  |
| Instrument Play                                 |                          |                                  |
| Iso-Principle                                   |                          |                                  |
| Life Review with Music/ Music Cued Reminiscence |                          |                                  |
| Living Legacy Project                           |                          |                                  |
| Movement to Music                               |                          |                                  |
| Music Listening                                 |                          |                                  |
| Progressive Muscle Relaxation with Music        |                          |                                  |
| Sensory Stimulation with Music                  |                          |                                  |

|                        |  |  |
|------------------------|--|--|
| Songwriting            |  |  |
| Therapeutic Singing    |  |  |
| other (please specify) |  |  |

23. Which PHYSICAL/PHYSIOLOGICAL areas are you addressing in telehealth sessions with older adults? (select all that apply)

- auditory perception
- motor skills
- pain (physical)
- physiological symptoms
- range of motion
- relaxation
- sensorimotor skills
- sensory perception
- sensory processing
- strength and endurance
- other (please specify) \_\_\_\_\_
- NONE

24. Which SOCIAL areas are you addressing in telehealth sessions with older adults? (select all that apply)

- ability to empathize
- family dynamics
- group cohesion and/or a feeling of group membership
- interactive response
- participation/engagement
- sense of self with others
- social skills and interactions
- support systems
- other (please specify) \_\_\_\_\_
- NONE

25. Which EMOTIONAL areas are you addressing in telehealth sessions with older adults? (select all that apply)

- abuse and trauma

adjustment to life changes or temporary or permanent changes in ability  
aesthetic sensitivity  
affect, emotion and moods  
agitation  
aggression  
anticipatory grief  
anxiety  
bereavement  
depression  
grief and loss  
self-esteem  
self-motivation  
other (please specify) \_\_\_\_\_  
NONE

26. Which COGNITIVE areas are you addressing in telehealth sessions with older adults? (select all that apply)

attention (i.e., focused, sustained, selective, alternating, divided)  
executive functions (e.g., decision making, problem solving)  
impulse control  
initiation  
memory  
neurological and cognitive function  
pain (psychological)  
on-task behavior  
reality orientation  
self-awareness and insight  
sensory orientation (e.g., maintenance attention, vigilance)  
stress management  
other (please specify) \_\_\_\_\_  
NONE

27. Which SPEECH/LANGUAGE AND COMMUNICATION areas are you addressing in telehealth sessions with older adults? (select all that apply)

enunciation and vocal production



1  
2  
3  
4  
5  
6  
7  
8  
9  
10  
11  
12  
13  
14  
15  
16  
17  
18  
19  
20  
21  
22  
23  
24  
25  
26  
27  
28  
29  
30  
31  
32  
33  
34  
35  
36  
37  
38  
39  
40  
41  
42  
43  
44  
45  
46  
47  
48  
49  
50  
51  
52  
53  
54  
55  
56  
57  
58  
59  
60

- language skills
- oral motor control
- respiratory function
- verbal and nonverbal communication
- other (please specify) \_\_\_\_\_
- NONE

28. Which SPIRITUAL areas are you addressing in telehealth sessions with older adults? (select all that apply)

- spirituality
- other (please specify) \_\_\_\_\_
- NONE

29. Which PERSONAL AUTONOMY, INDEPENDENCE AND WELLNESS areas are you addressing in telehealth sessions with older adults? (select all that apply)

- ability to use music independently for self-care
- activities of daily living
- autonomy
- coping skills
- functional independence
- danger to self or others (e.g., suicidality, self-injurious behavior)
- generalization of skills
- music and other creative responses
- quality of life
- responsibility for self
- wellness
- other (please specify) \_\_\_\_\_
- NONE

***MT Materials***

30. What instruments do you (as the music therapist) use for the Telehealth sessions with older adults? (select all that apply)

- guitar
- keyboard
- drums
- autoharp

1  
2  
3  
4 electronic instruments  
5 guiro  
6 jingle sticks  
7 maracas  
8 ocean drum  
9  
10  
11 Orff instruments  
12 shaker eggs  
13 tambourine  
14 tone chimes  
15 woodblock  
16 wrist bells  
17 other (please specify) \_\_\_\_\_  
18  
19  
20  
21  
22 NONE  
23  
24

25 31. What equipment and props do you (as the music therapist) use for the Telehealth sessions with  
26 older adults? (select all that apply)  
27

28 balloons  
29 balls  
30 canes  
31 CD/MP3 player  
32 smartphone  
33 hats  
34 hoops  
35 parachute  
36 paper plates  
37 scarves  
38 co-oper band  
39 octaband  
40 canopy scarf  
41 other (please specify) \_\_\_\_\_  
42  
43  
44  
45  
46  
47  
48  
49  
50 NONE  
51  
52

53 ***Client Materials***

54 32. Have you provided kits of instruments and/or props to older adult clients to use in Telehealth  
55 sessions?  
56  
57  
58  
59  
60

1  
2  
3  
4  
5  
6  
7  
8  
9  
10  
11  
12  
13  
14  
15  
16  
17  
18  
19  
20  
21  
22  
23  
24  
25  
26  
27  
28  
29  
30  
31  
32  
33  
34  
35  
36  
37  
38  
39  
40  
41  
42  
43  
44  
45  
46  
47  
48  
49  
50  
51  
52  
53  
54  
55  
56  
57  
58  
59  
60

Yes  
No

33. What instruments do your clients use for the Telehealth sessions with older adults? (select all that apply)

- guitar
- keyboard
- drums
- autoharp
- electronic instruments
- guiro
- jingle sticks
- maracas
- ocean drum
- Orff instruments
- shaker eggs
- tambourine
- tone chimes
- woodblock
- wrist bells
- other (please specify) \_\_\_\_\_
- NONE

34. What equipment and props do your clients use in Telehealth sessions? (select all that apply)

- balloons
- balls
- canes
- CD/MP3 player
- smartphone
- hats
- hoops
- parachute
- paper plates
- scarves
- co-oper band

octaband  
canopy scarf  
other (please specify) \_\_\_\_\_  
NONE

### Consent

35. Have you incorporated a separate Telehealth informed consent document with older adults?

Yes

No

36. How have you ensured informed consent of clients when providing Telehealth services with older adults?

Document co-signed by client

Verbal consent

I have not ensured informed consent

I do not know

Other (please specify) \_\_\_\_\_

### Evaluation of Telehealth

37. What are the strengths you find with a Telehealth format when working with older adults?

(open-ended)

38. What challenges do you find with a Telehealth format when working with older adults? (select all that apply)

vocal strain

eye strain

longer prep time

lack of confidence

other (please specify) \_\_\_\_\_

39. How has Telehealth changed or modified the services that you provide with older adults?

(open-ended)

Therapeutic Areas of Focus

Therapeutic Areas of Focus Addressed in Telehealth (n = 65)

| Area of Focus <sup>a</sup>                                               | n  |
|--------------------------------------------------------------------------|----|
| Quality of life                                                          | 63 |
| Participation/engagement                                                 | 61 |
| Affect, emotions and moods                                               | 58 |
| Relaxation                                                               | 57 |
| Anxiety                                                                  | 48 |
| Attention                                                                | 46 |
| Spirituality                                                             | 46 |
| Memory                                                                   | 45 |
| Adjustments to life changes or temporary or permanent changes in ability | 44 |
| Interactive response                                                     | 44 |
| Depression                                                               | 43 |
| Coping skills                                                            | 42 |
| Musical and other creative responses                                     | 42 |
| Social skills and interactions                                           | 41 |
| Wellness                                                                 | 40 |
| Support systems                                                          | 39 |
| Verbal and non-verbal communication                                      | 37 |
| Group cohesion and/or feeling of group membership                        | 34 |
| Sense of self with others                                                | 33 |
| Agitation                                                                | 32 |
| Pain (e.g., physical, psychological)                                     | 32 |
| Reality orientation                                                      | 32 |
| Executive functions (e.g., decision making, problem solving)             | 31 |
| Neurological and cognitive function                                      | 31 |
| Ability to use music independently for self-care                         | 30 |
| Stress management                                                        | 30 |
| Physiological symptoms                                                   | 26 |
| Grief and loss                                                           | 25 |
| Self-esteem                                                              | 25 |
| Self-motivation                                                          | 25 |
| Self-awareness and insight                                               | 24 |
| Respiratory function                                                     | 23 |
| Anticipatory grief                                                       | 22 |
| Range of motion                                                          | 22 |
| Motor skills                                                             | 21 |
| Family dynamics                                                          | 20 |
| Sensory orientation (e.g., maintenance attention, vigilance)             | 20 |
| Autonomy                                                                 | 18 |
| On-task behavior                                                         | 17 |
| Strength and endurance                                                   | 17 |
| Initiation                                                               | 16 |
| Bereavement                                                              | 15 |
| Enunciation and vocal production                                         | 14 |
| Ability to empathize                                                     | 13 |
| Auditory perception                                                      | 13 |
| Sensory processing                                                       | 13 |
| Sensorimotor skills                                                      | 12 |
| Functional independence                                                  | 11 |
| Oral motor control                                                       | 11 |
| Aesthetic sensitivity                                                    | 10 |

| Area of Focus <sup>a</sup>                                            | n  |
|-----------------------------------------------------------------------|----|
| Activities of daily living                                            | 9  |
| Aggression                                                            | 9  |
| Generalization of skills                                              | 9  |
| Language skills                                                       | 9  |
| Sensory perception                                                    | 8  |
| Impulse control                                                       | 7  |
| Responsibility for self                                               | 6  |
| Abuse and trauma                                                      | 1  |
| Danger to self or others (e.g., suicidality, self-injurious behavior) | 1  |
| Other <sup>b</sup>                                                    | 12 |

<sup>a</sup>CBMT Board Certification Domains (2020, III.A.2); <sup>b</sup> Other = social isolation (7), sensory stimulation (2), spiritual support (2), expression, sense of normality, and terminal agitation.
